# Supplementary material for: Comparison of ten packages that compute ocean carbonate chemistry
Source: Copernicus journal article supplement (doi:10.5194/bg-12-1483-2015), 2015-03-09
Supplement: Supplementary file 1 [file bg-12-1483-2015-supplement.zip]

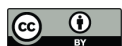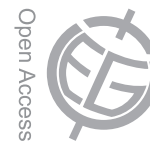

## *Supplement of*

# **Comparison of ten packages that compute ocean carbonate chemistry**

**J. C. Orr et al.**

*Correspondence to:* J. C. Orr (james.orr@lsce.ipsl.fr)

- bg-12-1483-2015-supplement-cover-letter.pdf
- output
  - co2calc
    - \* DIC-Alk-P-vary-from-co2calc.csv
    - \* DIC-Alk-Pt2-vary-from-co2calc.csv
    - \* DIC-Alk-S-vary-from-co2calc.csv
    - \* DIC-Alk-T-vary-from-co2calc.csv
  - co2sys-matlab
    - \* DIC-Alk-P-vary-from-co2sys-matlab.csv
    - \* DIC-Alk-Pt2-vary-from-co2sys-matlab.csv
    - \* DIC-Alk-S-vary-from-co2sys-matlab.csv
    - \* DIC-Alk-T-vary-from-co2sys-matlab.csv
  - csys
    - \* DIC-Alk-P-vary-from-csys.csv
    - \* DIC-Alk-Pt2-vary-from-csys.csv
    - \* DIC-Alk-S-vary-from-csys.csv
    - \* DIC-Alk-T-vary-from-csys.csv
  - mocsy
    - \* DIC-Alk-P-vary-from-mocsy.csv
    - \* DIC-Alk-Pt2-vary-from-mocsy.csv
    - \* DIC-Alk-S-vary-from-mocsy.csv
    - \* DIC-Alk-T-vary-from-mocsy.csv
  - odv
    - \* DIC-Alk-P-vary-from-odv.csv
    - \* DIC-Alk-Pt2-vary-from-odv.csv
    - \* DIC-Alk-S-vary-from-odv.csv
    - \* DIC-Alk-T-vary-from-odv.csv

- seacarb
  - \* DIC-Alk-P-vary-from-seacarb.csv
  - \* DIC-Alk-Pt2-vary-from-seacarb.csv
  - \* DIC-Alk-S-vary-from-seacarb.csv
  - \* DIC-Alk-T-vary-from-seacarb.csv
- swco2
  - \* DIC-Alk-P-vary-from-swco2.csv
  - \* DIC-Alk-Pt2-vary-from-swco2.csv
  - \* DIC-Alk-S-vary-from-swco2.csv
  - \* DIC-Alk-T-vary-from-swco2.csv
